# Supplementary material
Source: Springer Nature journal article supplement (https://www.springermedizin.de/resource/supplementary/12958_2014_1251_MOESM4_ESM.pdf/9567158)

Relative expression (AU)

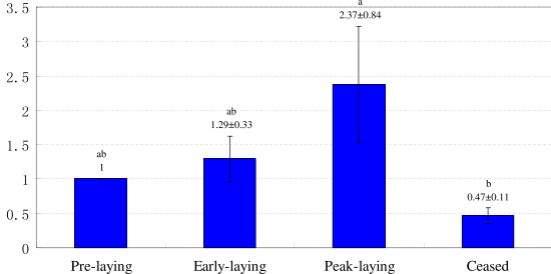

Supplement: MOESM4 [file 9567158]
